# Supplementary material for: Spatial reversal learning defect coincides with hypersynchronous telencephalic BOLD functional connectivity in APPNL-F/NL-F knock-in mice
Source: PubMed Central journal article supplement (PMC5908850; doi:10.1038/s41598-018-24657-9), 2018-04-19
Supplement: 41598_2018_24657_MOESM1_ESM.pdf [file 41598_2018_24657_MOESM1_ESM.pdf]

**Spatial reversal learning defect coincides with hypersynchronous telencephalic BOLD functional connectivity in APP<sup>NL-F/NL-F</sup> knock-in mice**

Disha Shah<sup>1,2,3\*</sup>, Amira Latif Hernandez<sup>2\*</sup>, Bart De Strooper<sup>3</sup>, Takashi Saito<sup>4</sup>, Takaomi Saido<sup>4</sup>, Marleen Verhoye<sup>1</sup>, Rudi D'Hooge<sup>2</sup>, Annemie Van der Linden<sup>1</sup>

<sup>1</sup> Bio-Imaging Lab, University of Antwerp, Belgium

<sup>2</sup> Laboratory of Biological Psychology, KU Leuven, Belgium

<sup>3</sup> VIB Center for the Biology of Disease, KU Leuven, Belgium

<sup>4</sup> Laboratory for Proteolytic Neuroscience, Riken Brain Science Institute, Japan

\* Equal contribution

Corresponding authors: Annemie Van der Linden, PhD; Disha Shah

[annemie.vanderlinden@uantwerpen.be](mailto:annemie.vanderlinden@uantwerpen.be); [disha.shah@kuleuven.be](mailto:disha.shah@kuleuven.be)

## Supplementary Figures

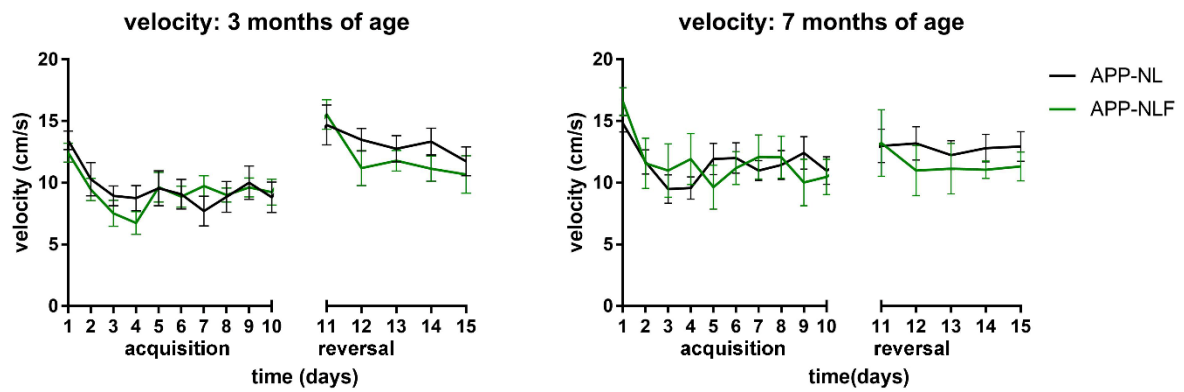

**Figure S1: Velocity during the Morris water maze behaviour task.** Velocity (cm/s)  $\pm$  standard error shown for the acquisition and reversal phase of the Morris water maze task for 3 and 7 months old APP<sup>NL/NL</sup> and APP<sup>NLF/NLF</sup> mice. RM-ANOVA showed no significant differences between groups.

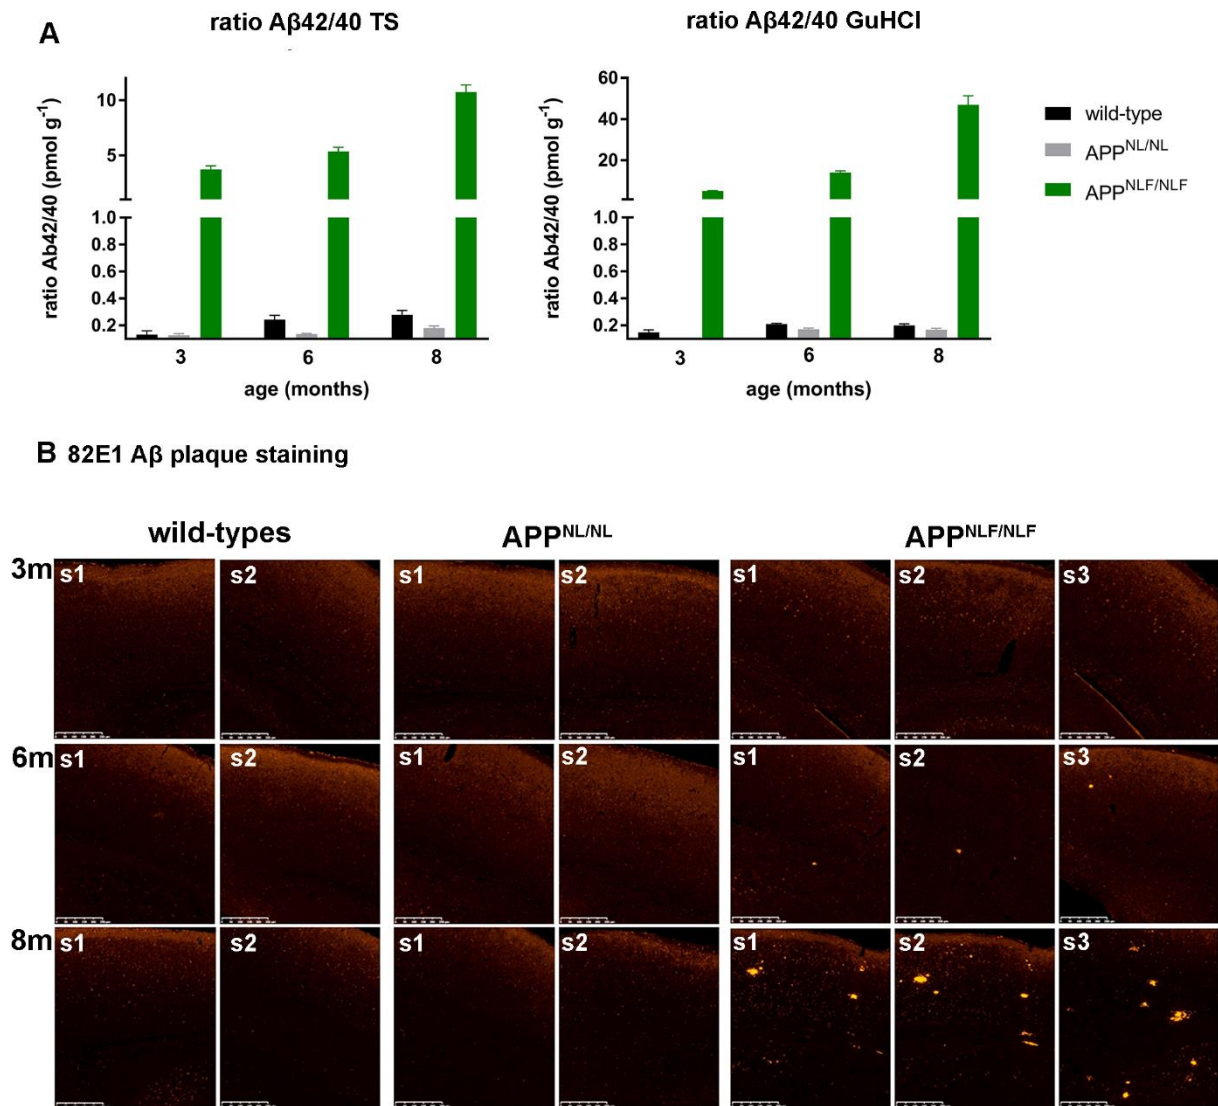

**Figure S2: A $\beta$  pathology.** **A)** Biochemical quantities of A $\beta$ 42/40 ratio in the brains of wild-type, APP<sup>NL/NL</sup> and APP<sup>NLF/NLF</sup> mice at 3 (N=3/group), 6 (N=3/group) and 8 (wild-types N=3, APP<sup>NL/NL</sup> N=3, APP<sup>NLF/NLF</sup> N=4) months of age. A $\beta$  levels (pmol/g) were measured from Tris-HCl-buffered saline (TS) and guanidine-HCl (GuHCl) fractions and quantified by sandwich ELISA as previously described<sup>1</sup>. Data are shown as ratio A $\beta$ 42/40  $\pm$  standard error. **B)** Brain sections from 3, 6 and 8 months old wild-type (N=2/age group), APP<sup>NL/NL</sup> (N=2/age group) and APP<sup>NLF/NLF</sup> (N=3/age group) were immunostained with 82E1 N-terminal specific A $\beta$  antibody (IBL, Japan) to detect A $\beta$  plaques using a previously described protocol<sup>1</sup>. Scale bars represent 250  $\mu$ m.

#### References:

1. Saito, T. *et al.* Single App knock-in mouse models of Alzheimer's disease. *Nat Neurosci* **17**, 661–663 (2014).
